# Supplementary material for: Evolution of the Natural Transformation Protein, ComEC, in Bacteria
Source: Front Microbiol. 2018 Dec 12;9:2980. doi: 10.3389/fmicb.2018.02980 (PMC6299819; doi:10.3389/fmicb.2018.02980)
Supplement: TABLE S1 — Domain profiles of ComEC in bacteria confirmed to be capable of natural transformation. [file Table_1.xlsx]

## Sheet: Sheet1
ID	Sequence Length	Strain	Phylum	DUF4131	Competence	Lactamase_B	PMID	Chromosome Accession	RefSeq	ComEC SwissProt ID	ComEC Locus Tag
tr|G2NE25|G2NE25_STREK	872	Streptomyces virginiaeb(spp. ) SirexAA-E	Actinobacteria	0	1	1	7968924	CP002993.1	NC_015953	G2NE25	SACTE_1980
tr|B3EDH5|B3EDH5_CHLL2	734	Chlorobium limicola DSM 245	Bacteriodia	1	1	1	7968924	CP001097.1	NC_010803	B3EDH5	Clim_1551
tr|Q7MUD5|Q7MUD5_PORGI	511	Porphyromonas gingivalis W83	Bacteriodia	0	1	0	22294679	CP000510.1	NC_008709	Q7MUD5	PG_1594
YP_002344602.1	419	Campylobacter jejuni subsp. jejuni NCTC 11168 = ATCC 700819	Campylobacterota	0	1	0	7968924		NC_002163
NP_208153.1	417	Helicobacter pylori 26695	Campylobacterota	0	1	0	7968924		NC_000915
tr|Q8KCP6|Q8KCP6_CHLTE	729	Chlorobium tepidum TLS	Chlorobi	1	1	0	17997281	AE006470.1;AL646053.1	NC_002932	Q8KCP6	CT1367
tr|Q9RTB1|Q9RTB1_DEIRA	755	Deinococcus radiodurans R1	Chlorobi	0	1	0	7968924	AE000513;AE001825		Q9RTB1	DR_1854
TrEMBL|Q5N1I4|Release	728	Synechococcus elongatus PCC 6301	Cyanobacteria	1	1	0	7968924	AP008231.1	NC_006576	Q5N1I4	syc1646_c
tr|P73100|P73100_SYNY3	709	Synechocystis spp. PCC6803	Cyanobacteria	1	1	0	7968924	BA000022.2	NC_000911	P73100	sll1929
tr|Q8DI88|Q8DI88_THEEB	761	Thermosynechococcus elongatus BP-1	Cyanobacteria	1	1	0	17997281	BA000039.2	NC_004113	Q8DI88	tll1702
tr|Q72H92|Q72H92_THET2	677	Thermus thermophilus HB27	Deinococci	0	1	0	7968924	AE017221.1	NC_005835	Q72H92	TT_C1603
TrEMBL|I4E076|Release	744	Streptococcus intermedius JTH08	Firmicutes	1	1	0	17997281	AP010969.1	NC_018073	I4E076	SCIM_0912
tr|H2A5D3|H2A5D3_STRMD	743	Streptococcus macedonicus ACA-DC 198	Firmicutes	1	1	1	20969646	HE613569.1	NC_016749	H2A5D3	SMA_0621
tr|D3H8K8|D3H8K8_STRM6	746	Streptococcus mitis B6	Firmicutes	1	1	0	17997281	FN568063.1	NC_013853	D3H8K8	smi_0956
tr|A7Z6X1|A7Z6X1_BACMF	783	Bacillus amyloliquefaciens FZB42	Firmicutes	1	1	1	17997281	CP000560.1	NC_009725	A7Z6X1	RBAM_023870
tr|Q65H43|Q65H43_BACLD	795	Bacillus licheniformis DSM 13	Firmicutes	1	1	1	7968924	AE017333.1	NC_006322	Q65H43	BLi02750
sp|P39695|COMEC_BACSU	776	Bacillus subtilis 168	Firmicutes	1	1	1	7968924	AL009126.3	NC_000964	P39695	BSU25570
tr|Q38WR1|Q38WR1_LACSS	755	Lactobacillus sakei 23K	Firmicutes	0	1	1	22409597	CR936503.1	NC_007576	Q38WR1	LCA_1069
tr|K0D947|K0D947_LEUCJ	761	Leuconostoc carnosum JB16	Firmicutes	1	1	0	17997281	CP003851.1	NC_018673	K0D947	C270_01930
TrEMBL|Q99TR1|Release	733	Staphylococcus aureus Mu50	Firmicutes	0	1	1	23133387	BA000017.4	NC_002758	Q99TR1	SAV1588
tr|A8AYL9|A8AYL9_STRGC	746	Streptococcus gordonii Challis	Firmicutes	1	1	0	17997281	CP000725.1	NC_009785	A8AYL9	SGO_1601
tr|H6P9F4|H6P9F4_STRIC	687	Streptococcus infantarius CJ18	Firmicutes	0	1	1	20969646	CP003295.1	NC_016826	H6P9F4	Sinf_0543
tr|Q8DV79|Q8DV79_STRMU	744	Streptococcus mutans UA159	Firmicutes	1	1	1	7968924	AE014133.2	NC_004350	Q8DV79	SMU_626
tr|F2QE02|F2QE02_STROU	746	Streptococcus oralis Uo5	Firmicutes	1	1	0	17997281	FR720602.1	NC_015291	F2QE02	SOR_1213
tr|Q8DQ40|Q8DQ40_STRR6	746	Streptococcus pneumoniae R6	Firmicutes	1	1	0	7968924	AE007317.1	NC_003098	Q8DQ40	spr0857
tr|F8LRF3|F8LRF3_STRE8	746	Streptococcus salivarius JIM8777	Firmicutes	1	1	1	20023010	FR873482.1		F8LRF3	SALIVA_1617
tr|A3CLU7|A3CLU7_STRSV	746	Streptococcus sanguinis SK36	Firmicutes	1	1	0	7968924	CP000387.1	NC_009009	A3CLU7	SSA_0716
TrEMBL|Q03JE9|Release	746	Streptococcus thermophilus	Firmicutes	1	1	1	17997281	CP000419.1	NC_008532	Q03JE9	STER_1520
tr|A4XSQ9|A4XSQ9_PSEMY	741	Pseudomonas mendocina ymp	Proteobacteria	0	1	1	7968924	CP000680.1;AE003853.1	NC_009439	A4XSQ9	Pmen_1611
tr|A3N0C8|A3N0C8_ACTP2	764	Actinobacillus pleuropneumoniae L20	Proteobacteria	1	1	1	17997281	CP000569.1	NC_009053	A3N0C8	APL_0766
tr|K0G559|K0G559_ACTSU	764	Actinobacillus suis H91-0380	Proteobacteria	0	1	0	23663205	CP003875.1	NC_018690	K0G559	ASU2_03145
tr|C9R469|C9R469_AGGAD	744	Aggregatibacter actinomycetemcomitans D11S-1	Proteobacteria	0	1	1	17997281	CP001733.1	NC_013416	C9R469	D11S_1223
TrEMBL|C6ANC3|Release	755	Aggregatibacter aphrophilus NJ8700	Proteobacteria	1	1	1	17997281	CP001607.1	NC_012913	C6ANC3	NT05HA_0957
tr|C1DR16|C1DR16_AZOVD	711	Azotobacter vinelandii DJ; ATCC BAA-1303	Proteobacteria	1	1	1	7968924	CP001157.1	NC_012560	C1DR16	Avin_14730
sp|P37443|YCAI_ECOLI	754	Escherichia coli K-12	Proteobacteria	1	1	1	19502395	U00096.2	NC_000913	P37443	b0913
tr|F4HDN9|F4HDN9_GALAU	794	Gallibacterium anatis UMN179	Proteobacteria	1	1	1	22582057	CP002667.1	NC_015460	F4HDN9	UMN179_00665
sp|P44408|REC2_HAEIN	788	Haemophilus influenzae Rd KW20	Proteobacteria	1	1	1	7968924	L42023.1	NC_000907	P44408	HI_0061
tr|E1W502|E1W502_HAEP3	790	Haemophilus parainfluenzae T3T1	Proteobacteria	1	1	1	7968924	FQ312002.1	NC_015964	E1W502	PARA_13430
tr|B8F483|B8F483_HAEPS	759	Haemophilus parasuis SH0165	Proteobacteria	1	1	0	17997281	CP001321.1	NC_011852	B8F483	HAPS_0467
tr|Q5ZXV5|Q5ZXV5_LEGPH	735	Legionella pneumophila Philadelphia 1	Proteobacteria	1	1	0	17997281	AE017354.1	NC_002942	Q5ZXV5	lpg0626
tr|Q5F9W1|Q5F9W1_NEIG1	759	Neisseria gonorrhoeae FA 1090	Proteobacteria	1	1	1	7968924	AE004969.1	NC_002946	Q5F9W1	NGO0276
tr|Q9K0B2|Q9K0B2_NEIMB	691	Neisseria meningitidis MC58	Proteobacteria	1	1	1	7968924	AE002098.2	NC_003112	Q9K0B2	NMB0702
tr|Q3K8I9|Q3K8I9_PSEPF	747	Pseudomonas fluorescens Pf0-1	Proteobacteria	1	1	1	17997281	CP000094.2	NC_007492	Q3K8I9	Pfl01_4178
tr|A4VMT8|A4VMT8_PSEU5	741	Pseudomonas stutzeri A1501	Proteobacteria	1	1	1	7968924	CP000304.1	NC_009434	A4VMT8	PST_2639
tr|Q8Y0C4|Q8Y0C4_RALSO	847	Ralstonia solanacearum GMI1000	Proteobacteria	1	1	0	17997281	AL646052.1	NC_003295	Q8Y0C4	RSc1120
tr|Q9KQW8|Q9KQW8_VIBCH	752	Vibrio cholerae N16961	Proteobacteria	1	1	1	17997281	AE003852.1	NC_002505; NC_002506	Q9KQW8	VC_1879
tr|Q5E0F3|Q5E0F3_VIBF1	767	Vibrio fischeri ES114	Proteobacteria	1	1	1	21966921	CP000020.2; CP000021.2	NC_006840; NC_006841	Q5E0F3	VF_A0423
tr|Q87R17|Q87R17_VIBPA	752	Vibrio paraheamolyticus O3:K6	Proteobacteria	0	1	1	7968924	BA000032.2; BA000031.2	NC_004605; NC_004603	Q87R17
tr|A7K283|A7K283_VIBAE	752	Vibrio spp. EX25	Proteobacteria	1	1	1	7968924	CP001805.1; CP001806.1	NC_013456; NC_013457	A7K283	VEA_003988
TrEMBL|Q8DAV3|Release	749	Vibrio vulnificus CMCP6	Proteobacteria	1	1	1	19502446	AE016795.3 ;AE016796.2	NC_004459; NC_004460	Q8DAV3	VV1_2084
TrEMBL|B0U4R0|Release	825	Xylella fastidiosa M12	Proteobacteria	1	1	1	21666009	CP000941.1	NC_010513	B0U4R0	Xfasm12_0386
